# Supplementary material for: Comparing Bayesian and traditional end-member mixing approaches for hydrograph separation in a glacierized basin
Source: Copernicus journal article supplement (doi:10.5194/hess-24-3289-2020), 2020-06-29
Supplement: Supplementary file 1 [file hess-24-3289-2020-supplement.pdf]

Supplement of Hydrol. Earth Syst. Sci., 24, 3289–3309, 2020  
<https://doi.org/10.5194/hess-24-3289-2020-supplement>  
© Author(s) 2020. This work is distributed under  
the Creative Commons Attribution 4.0 License.

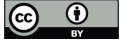

*Supplement of*

## **Comparing Bayesian and traditional end-member mixing approaches for hydrograph separation in a glacierized basin**

**Zhihua He et al.**

*Correspondence to:* Zhihua He (zhwork3533@163.com)

The copyright of individual parts of the supplement might differ from the CC BY 4.0 License.

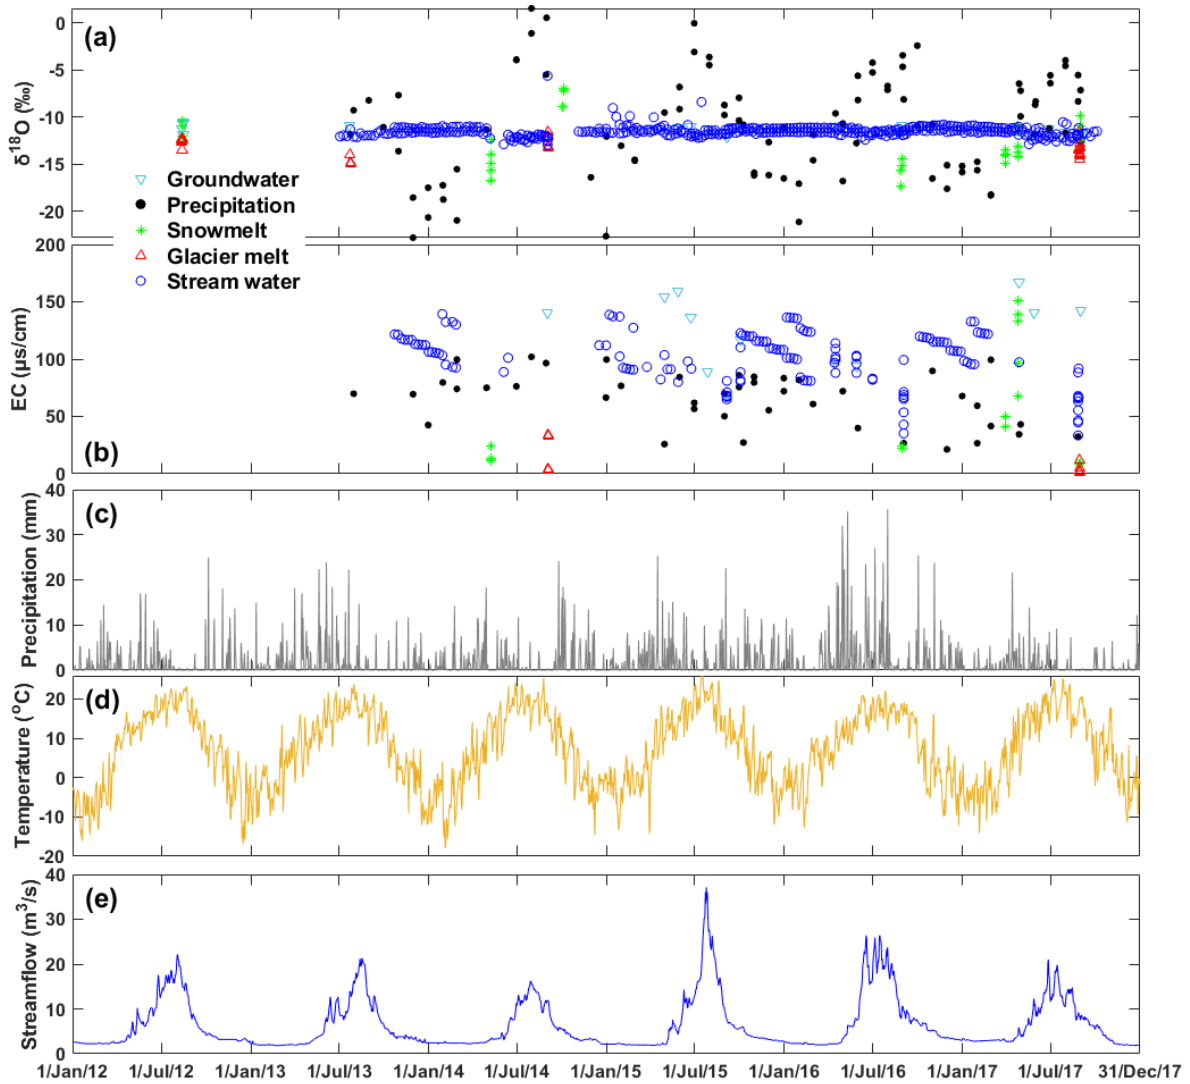

1  
 2 *Figure S1. (a)-(b) Tracer signatures of water samples during the sample period of 2012-*  
 3 *2017;(c)-(d) Daily precipitation and temperature measured at the Baitik meteorological*  
 4 *station in 2012-12017; (e) Daily streamflow measured at the Ala-Archa hydrologic station*  
 5 *during 2012-2017.*
